# Supplementary material
Source: ML conference proceedings conference paper supplement (https://openaccess.thecvf.com/content/CVPR_2019/html/Hu_Deep_Multimodal_Clustering_CVPR_2019_paper.html)
Supplement: Supplementary file 1 [file Hu_Deep_Multimodal_Clustering_CVPR_2019_supplemental.pdf]

Archive with 3 entries (2 files):
- 3380-supp/
- 3380-supp/3380-supp.pdf
- 3380-supp/DMC_demo.mp4
